# Supplementary material
Source: PubMed Central journal article supplement (PMC3109609)
Supplement: NIHMS295551-supplement-Supplementary_Data.pdf [file NIHMS295551-supplement-Supplementary_Data.pdf]

## Supporting Information

### Thiazolylpyrazoles as $\Delta$ F508-CFTR Correctors with Improved Hydrophilicity Compared to Bithiazoles

Long Ye, John M. Knapp, Panjamporn Sangwung, James C.  
Fettinger, A. S. Verkman, and Mark J. Kurth

#### Table of Contents:

**10a:** summary of data CCDC 767034

Formula: C<sub>18</sub> H<sub>24</sub> N<sub>4</sub> O<sub>3</sub> S<sub>1</sub>

Unit cell parameters: a 10.2685(15) b 11.2542(17) c 17.123(3)

alpha 72.768(2) beta 88.794(2) gamma 88.903(2)

space group P-1

**9f:** summary of data CCDC 767035

Formula: C<sub>21</sub> H<sub>23</sub> Br<sub>1</sub> N<sub>4</sub> O<sub>3</sub> S<sub>1</sub>

Unit cell parameters: a 10.0372(4) b 20.6057(8) c 11.0875(4) beta 107.7350(10)

space group P2<sub>1</sub>/c

Table 1. Calculated and extrapolated logP values of active thiazolylpyrazoles  
**11d/14a/14b/14e/14g/14h/14j** and the bithiazole **1** ..... S2

Table 2. Logk and logP values of reference compounds (used to establish the logP vs.  
logk trendline) and thiazolylpyrazole correctors ..... S3

Preparation of thiazolylpyrazole carboxylic acids of both regioisomers of N-substituted  
pyrazoles ..... S4

HPLC chromatograms and mass spectra for thiazolylpyrazole correctors..... S6

**Table 1.** Calculated and extrapolated logP values of active thiazolopyrazoles **11d/14a/14b/14e/14g/14h/14j** and the bithiazole **1**.

| compound | logP | clogP <sup>*a</sup> | relative difference (%) <sup>*b</sup> |
|----------|------|---------------------|---------------------------------------|
| 11d      | 5.52 | 5.61                | 1.63593                               |
| 14a      | 4.75 | 4.17                | 12.28250                              |
| 14b      | 4.53 | 3.82                | 15.58325                              |
| 14e      | 5.1  | 4.77                | 6.32385                               |
| 14g      | 5.70 | 5.78                | 1.42973                               |
| 14h      | 4.26 | 4.12                | 3.19175                               |
| 14j      | 3.46 | 3.40                | 1.61200                               |
| 1        | 5.71 | 5.6                 | 1.91409                               |

<sup>\*a</sup> calculated with ChemDraw ultra 11(Cambridge Software)

<sup>\*b</sup> Relative difference=[Absolute value of (logP-clogP)]/logP

**Table 2.** Logk and logP values of reference compounds (used to establish the logP vs. logk trendline) and thiazolyipyrazole correctors.

| Compound               | T1 <sup>*a</sup> | (T1-T0) <sup>*b</sup> | logk <sup>*c</sup> | logP               |
|------------------------|------------------|-----------------------|--------------------|--------------------|
| 4-chloro-Phenol        | 20.10            | 17.08                 | 0.752              | 2.4 <sup>*d</sup>  |
| 2,4-dichloro-Phenol    | 22.16            | 19.14                 | 0.802              | 3.21 <sup>*d</sup> |
| 3,4,5-trichloro-Phenol | 23.61            | 20.59                 | 0.834              | 4.36 <sup>*d</sup> |
| pentachlorophenol      | 25.83            | 22.81                 | 0.878              | 5.9 <sup>*d</sup>  |
| p, p'-DDT              | 28.80            | 25.78                 | 0.931              | 6.19 <sup>*d</sup> |
| 11d                    | 25.48            | 22.46                 | 0.871              | 5.52 <sup>*e</sup> |
| 14a                    | 24.12            | 21.1                  | 0.844              | 4.75 <sup>*e</sup> |
| 14b                    | 23.73            | 20.71                 | 0.836              | 4.53 <sup>*e</sup> |
| 14e                    | 24.71            | 21.69                 | 0.856              | 5.09 <sup>*e</sup> |
| 14g                    | 25.81            | 22.79                 | 0.878              | 5.70 <sup>*e</sup> |
| 14h                    | 23.28            | 20.26                 | 0.827              | 4.26 <sup>*e</sup> |
| 17                     | 22.00            | 18.98                 | 0.798              | 3.46 <sup>*e</sup> |
| 4a                     | 25.83            | 22.81                 | 0.878              | 5.71 <sup>*e</sup> |
| KBr                    | 3.02             | 0.00                  |                    |                    |

\*<sup>a</sup> Retention time on RP-HPLC.

\*<sup>b</sup> The difference between the retention time T<sub>1</sub> and the void time T<sub>0</sub>, which is the retention time of KBr

\*<sup>c</sup> logk is the capacity factor, which equals to  $\log [(T_1 - T_0) / T_0]$ .

\*<sup>d</sup> The logP value is found in reference 17.

\*<sup>e</sup> The logP value is extrapolated from the trendline that was established based on the values of the reference compounds, the substituted phenols and p,p'-DDT. The equation of the trendline is  $y = 23.304x - 15.151$  and the linear regression square  $R^2 = 0.96$ .

**Preparation of thiazolypyrazole carboxylic acids.** None of the thiazolypyrazole carboxylic acids are active in [I] influx cell assay. General procedure for the preparation of acids **12** and **15** as well as representative structural data.

**Scheme 1:**

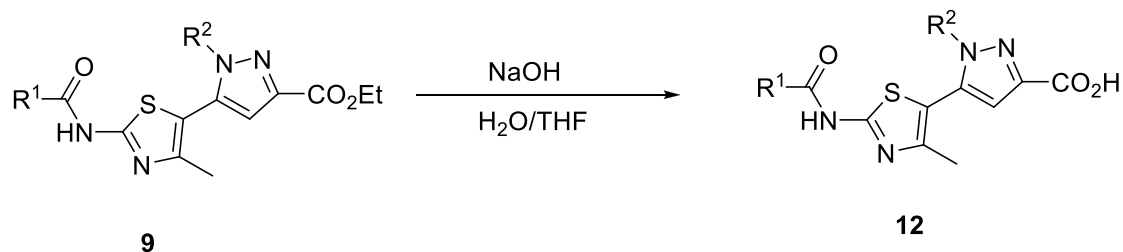

**Scheme 2:**

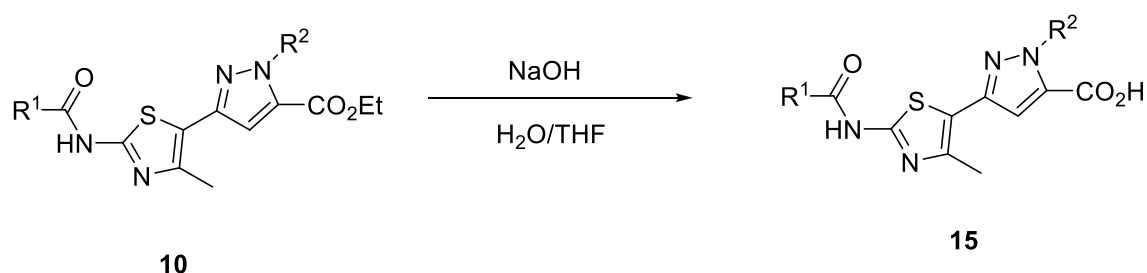

**General procedure of saponification of thiazolypyrazole esters:** To a 0.2 M solution of the ester (**9** or **10**; 1 equivalent) in 1:1 H<sub>2</sub>O/THF was added NaOH (4 equiv). The reaction mixture was stirred at room temperature for 24 h. When the reaction was complete, water, in the same volume as the reaction mixture, was added followed by concentrated HCl (dropwise) to adjust the pH to 3. The product, which precipitated, was collected by filtration and dried under vacuum. The <sup>1</sup>H NMR, <sup>13</sup>C NMR, and low resolution mass spectrometry data of representative acids **12** and **15** are listed below.

**1-(4-Bromophenyl)-5-(4-methyl-2-pivalamidothiazol-5-yl)-1H-pyrazole-3-carboxylic acid (12b).** Ester **9a** (R = H and R<sup>2</sup> = *p*-Br-Ph; 100 mg, 0.2 mmol) was reacted with NaOH (33 mg, 0.8 mmol) by the above general procedure and delivered **12b** as an off-white solid (76 mg, 81%). <sup>1</sup>H NMR (600 MHz, DMSO) δ 13.12 (s, 1H), 12.00 (s, 1H), 7.69 (d, *J* = 8.8, 2H), 7.36 (d, *J* = 8.8, 2H), 7.05 (s, 1H), 2.02 (s, 3H), 1.21 (s, 9H); <sup>13</sup>C NMR (151 MHz, DMSO) δ 177.58, 163.39, 159.33, 147.57, 145.49, 138.83, 136.07, 132.99, 127.60, 122.27, 112.92, 111.40, 104.99, 39.43, 27.15, 16.22; LC/MS(ESI): cal. [M+H<sup>+</sup>] = 463.04 and [M+2+H<sup>+</sup>] = 465.04, found 462.93 and 464.98.

**1-Allyl-3-(4-methyl-2-pivalamidothiazol-5-yl)-1H-pyrazole-5-carboxylic acid (15b).** Ester **10a** (R = H and R<sup>2</sup> = allyl; 95 mg, 0.25 mmol) was reacted with NaOH (40 mg, 1.0 mmol) by the above general procedure and delivered **15b** as an off-white solid (79 mg, 90%). <sup>1</sup>H NMR (600 MHz, DMSO) δ 13.60 (s, 1H), 11.78 (s, 1H), 6.97 (s, 1H), 6.00 (ddd, *J* = 5.5, 10.6, 22.5, 1H), 5.13 (dd, *J* = 3.6, 15.5, 3H), 4.98 (dd, *J* = 1.5, 17.1, 1H), 2.41 (s, 3H), 1.21 (s, 9H); <sup>13</sup>C NMR (151 MHz, DMSO) δ 177.28, 160.87, 156.73, 143.54, 134.86, 134.70, 117.67, 117.00, 109.40, 53.96, 39.43, 27.26, 17.00; LC/MS(ESI): cal. [M+H<sup>+</sup>] = 349.13, found 349.13

## HPLC chromatograms and mass spectra for thiazolylpyrazole correctors

10a (R = H, R<sup>2</sup> = Bn)

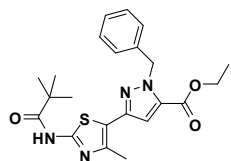

Calculated (cal. for short) [M+H<sup>+</sup>] = 427.18

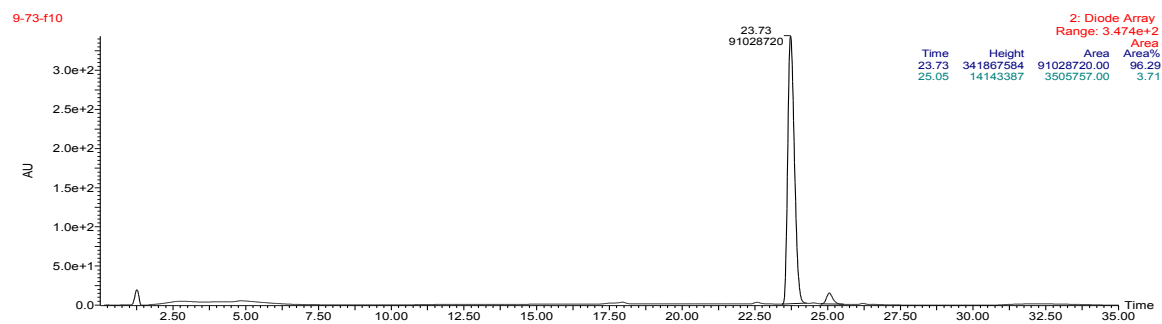

Figure SI-1. HPLC Chromatogram of compound 10a (R = H, R<sup>2</sup> = Bn)

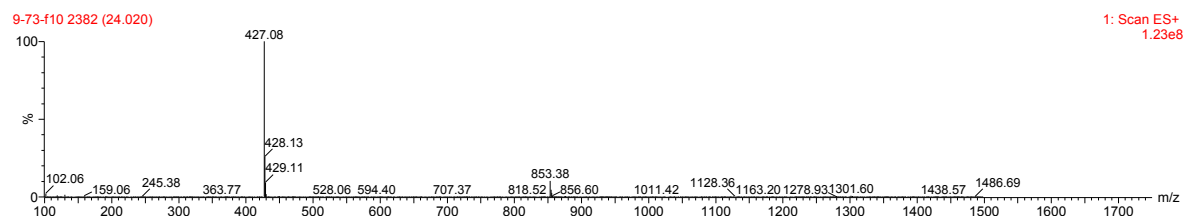

Figure SI-2. Mass spectrum of 10a (R = H, R<sup>2</sup> = Bn)

11d

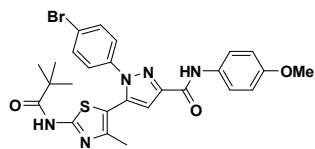

cal.  $[M+H]^+$  = 568.10

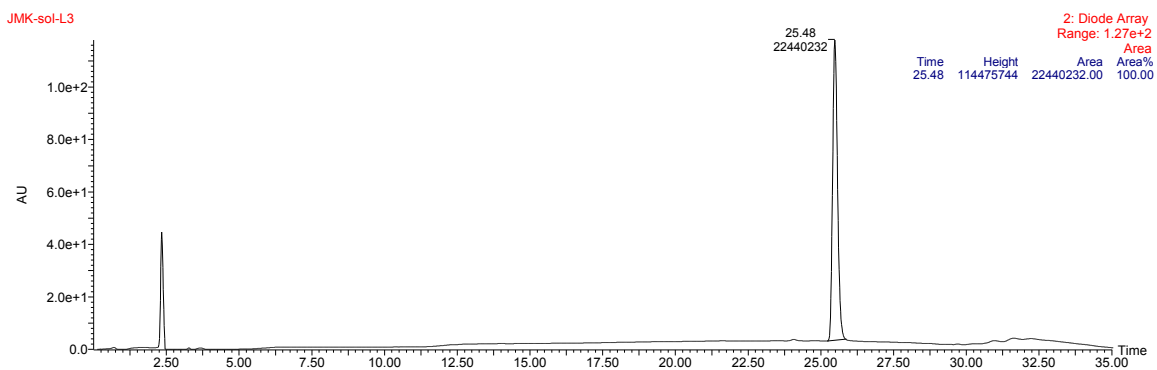

Figure SI-3. HPLC Chromatogram of compound 11d

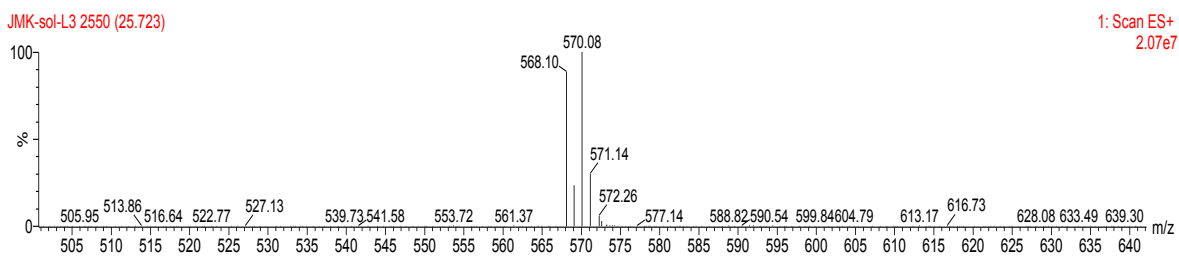

Figure SI-4. Mass spectrum of 11d

# 14a

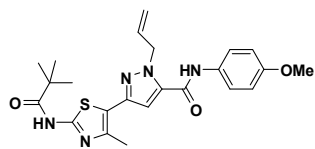

cal.  $[M+H^+]=454.19$

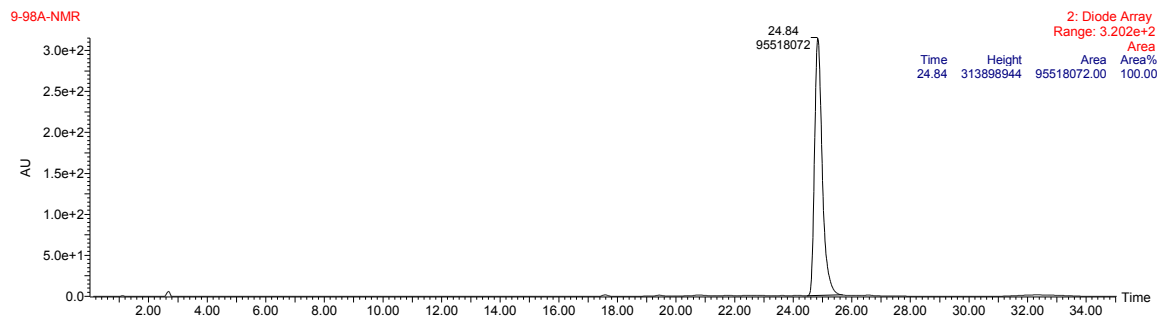

Figure SI-5. HPLC Chromatogram of compound 14a

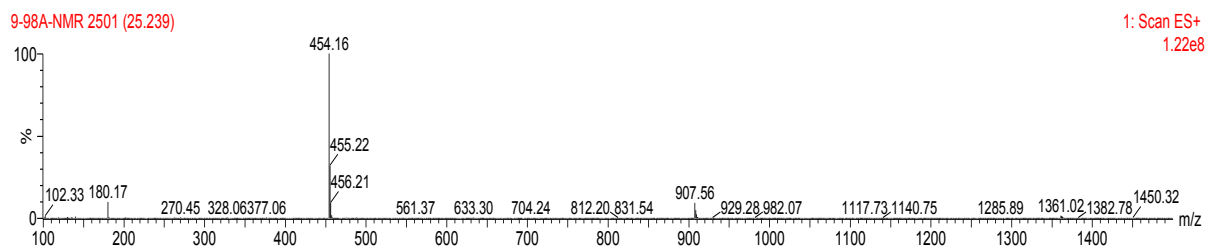

Figure SI-6. Mass spectrum of 14a



# 14b

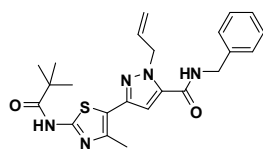

cal.  $[M+H]^+ = 438.20$

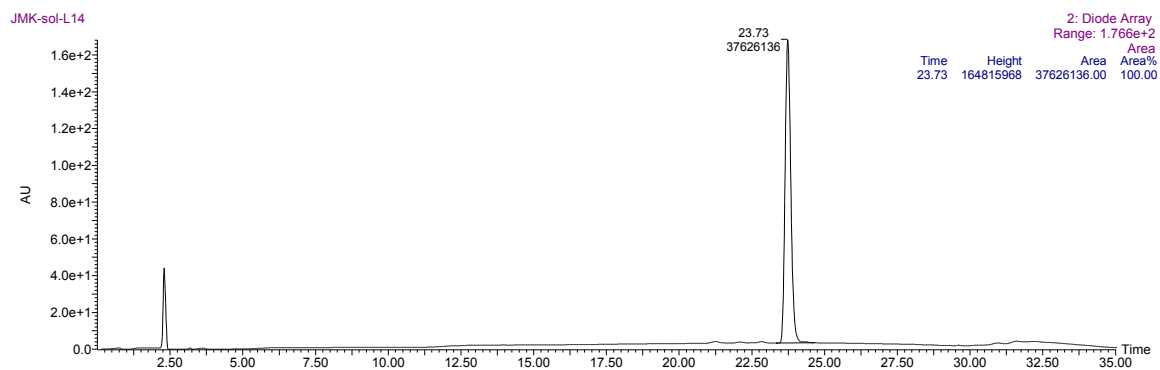

Figure SI-7. HPLC Chromatogram of compound 14b

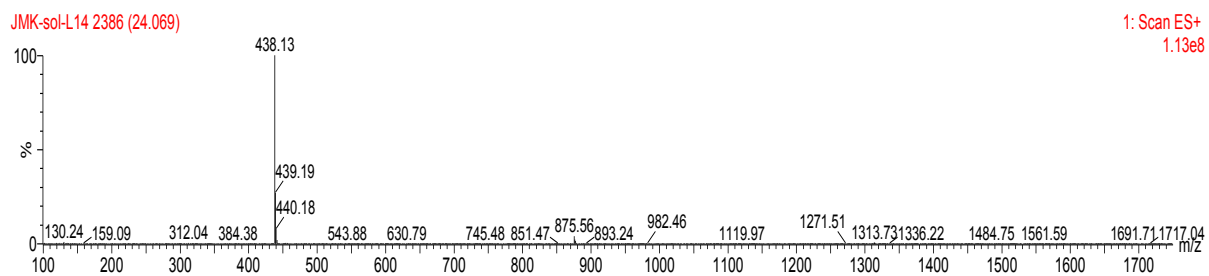

Figure SI-8. Mass spectrum of 14b

14e

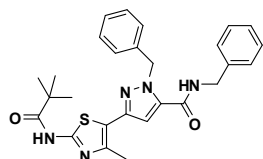

cal.  $[M+H]^+ = 488.21$

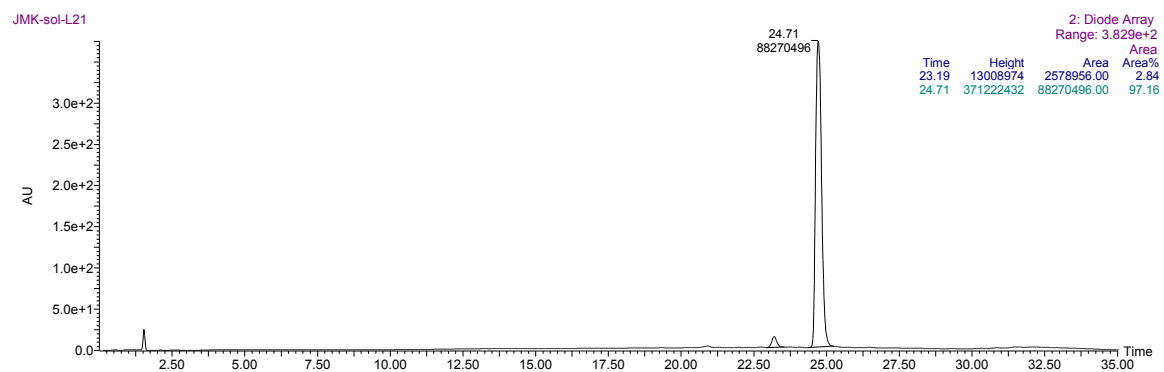

Figure SI-9. HPLC Chromatogram of compound 14e

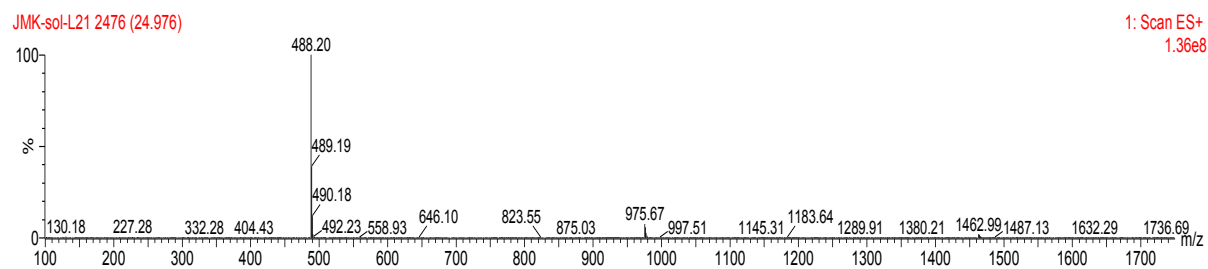

Figure SI-10. Mass spectrum of 14e

14g

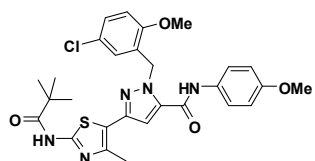

cal.  $[M+H^+]=568.18$

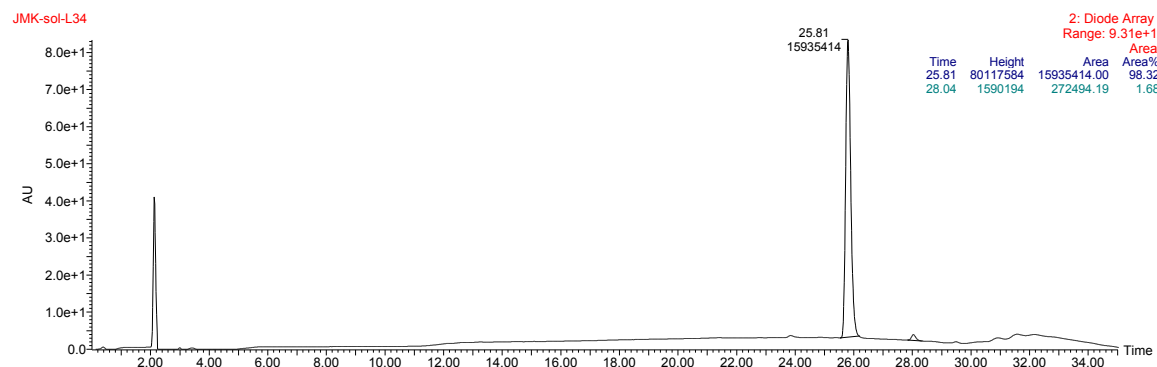

Figure SI-11. HPLC Chromatogram of compound 14g

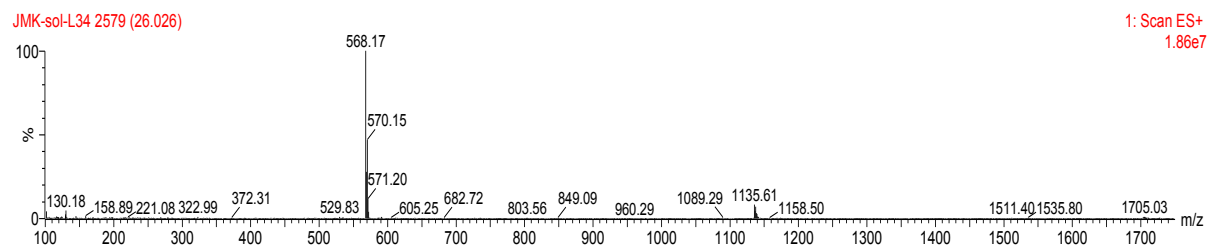

Figure SI-12. Mass spectrum of 14g

14h

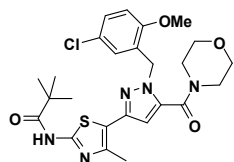

cal.  $[M+H^+]= 532.18$

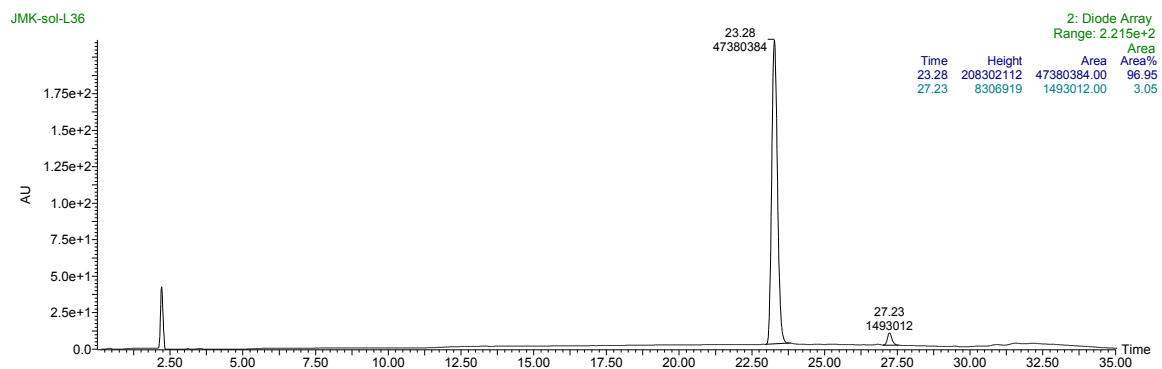

Figure SI-13. HPLC Chromatogram of compound 14h

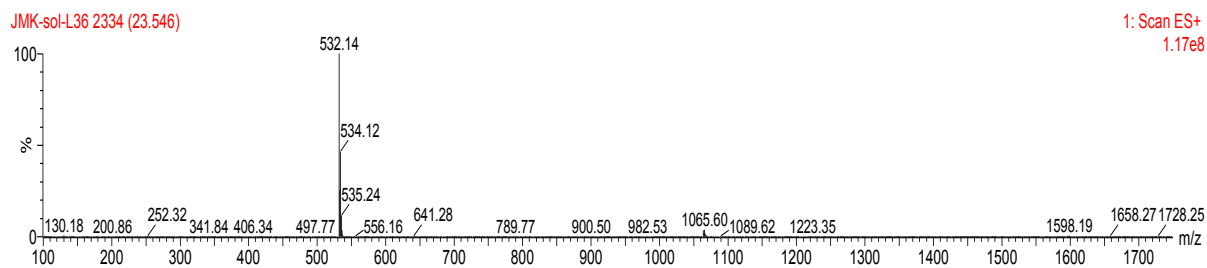

Figure SI-14. Mass spectrum of 14h
